# Supplementary material for: RIPK3 blockade attenuates tubulointerstitial fibrosis in a mouse model of diabetic nephropathy
Source: PubMed Central journal article supplement (PMC7319952; doi:10.1038/s41598-020-67054-x), 2020-06-26
Supplement: 41598_2020_67054_MOESM1_ESM.pdf [file 41598_2020_67054_MOESM1_ESM.pdf]

# **RIPK3 blockade attenuates tubulointerstitial fibrosis in a mouse model of diabetic nephropathy**

Ying Shi<sup>1</sup>, Chunling Huang<sup>1</sup>, Yongli Zhao<sup>2</sup>, Qinghua Cao<sup>1</sup>, Hao Yi<sup>1</sup>, Carol Pollock<sup>1\*</sup>, Xinming Chen<sup>1</sup>

<sup>1</sup> University of Sydney, Sydney Medical School, Kolling Institute of Medical Research  
Sydney, NSW 2065, Australia

<sup>2</sup> The Second Affiliated Hospital of Dalian Medical University, Department of Pediatrics  
467 Zhongshan Road, Shahekou District Dalian, Liaoning, CN 116027

\*Corresponding author, Carol A Pollock;

carol.pollock@sydney.edu.au

Supplementary Information

1. Uncropped blots

Uncropped P-RIPK3 blot

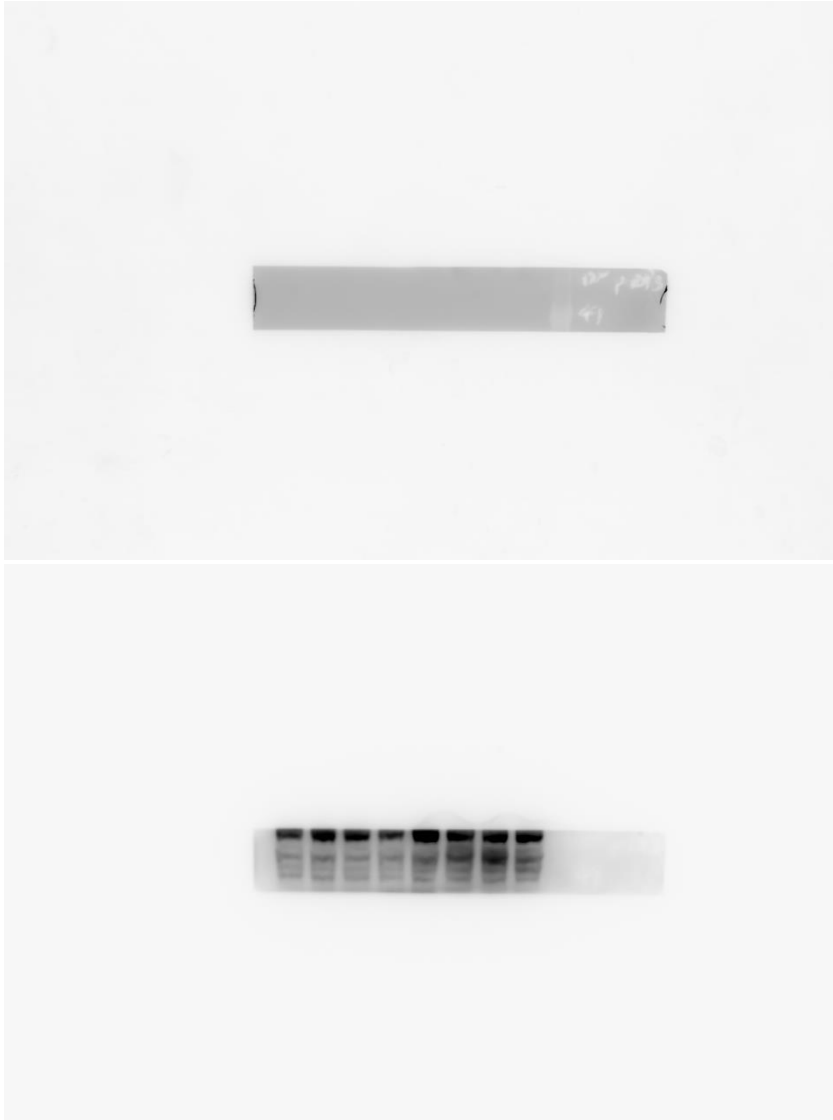

Uncropped tubulin blot

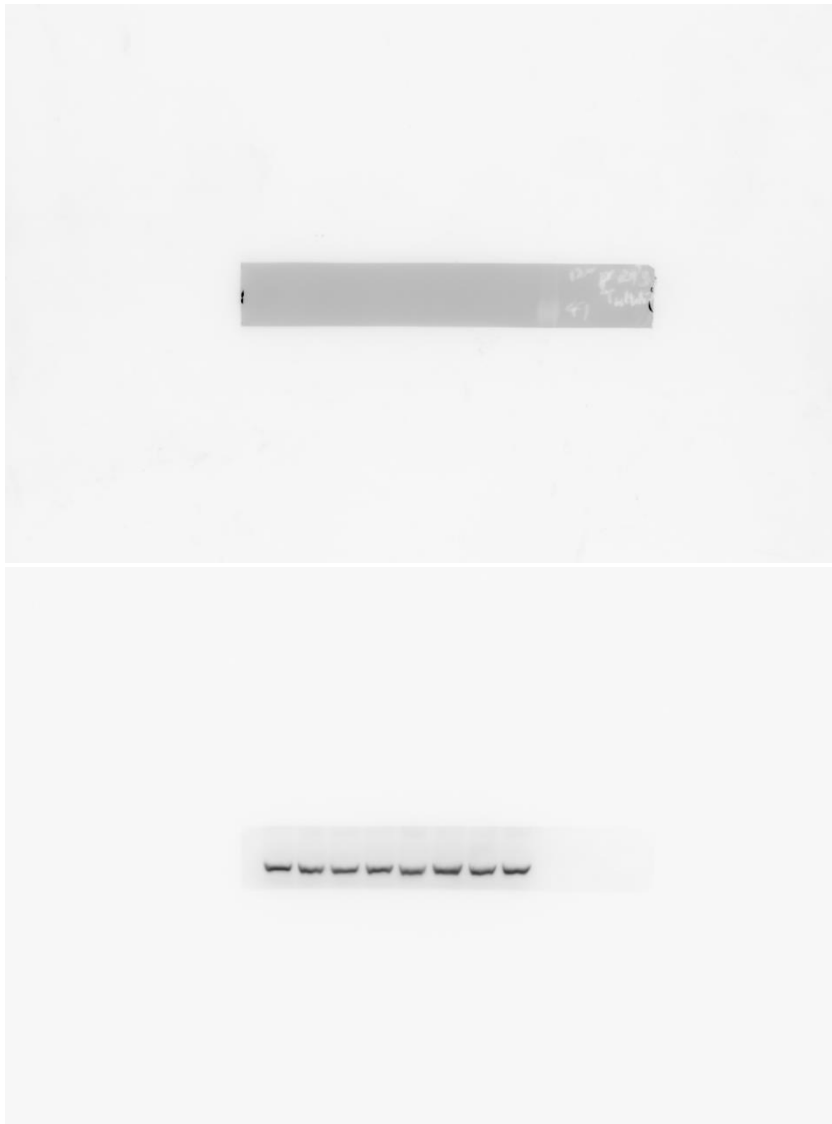

## 2. Supplementary data

Insulin doses administered to groups throughout the study

| Groups                    | No. of mice/group | No. of mice needing insulin treatment | insulin doses throughout the study |
|---------------------------|-------------------|---------------------------------------|------------------------------------|
| WT Ctrl                   | 14                | -                                     | -                                  |
| WT DN                     | 12                | 7                                     | 336 Units/mouse                    |
| RIPK3 <sup>-/-</sup> Ctrl | 14                | -                                     | -                                  |
| RIPK3 <sup>-/-</sup> DN   | 11                | 1                                     | 336 Units/mouse                    |

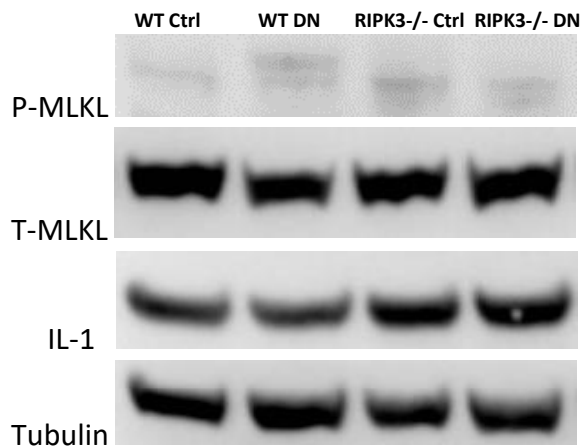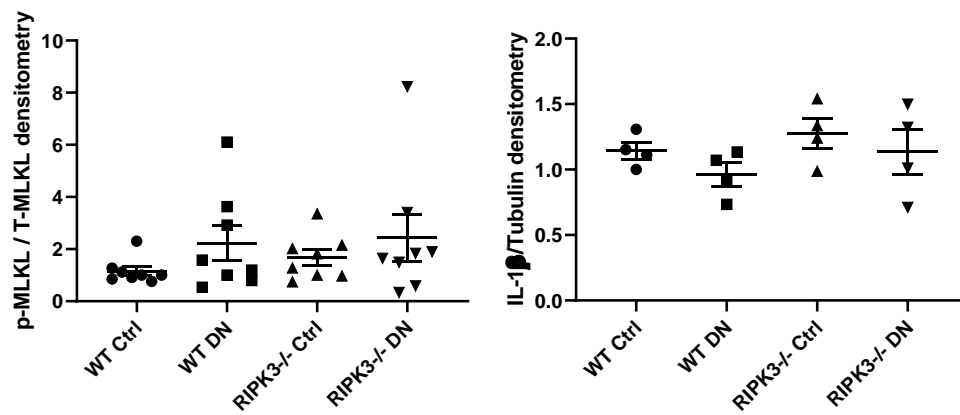

**MLKL phosphorylation and IL-1 $\beta$  expression.** Immunoblot analysed in kidneys from mice (wild-type WT or RIPK3<sup>-/-</sup>) +/- diabetes mellitus using antibodies for phospho-MLKL, Total MLKL, IL-1 $\beta$  and Tubulin. Statistical analysis was performed by one-way analysis of variance ANOVA followed by Tukey's multiple comparisons test. Each dot or triangle represents an individual sample, and horizontal bars denote the mean  $\pm$  S.E.M.

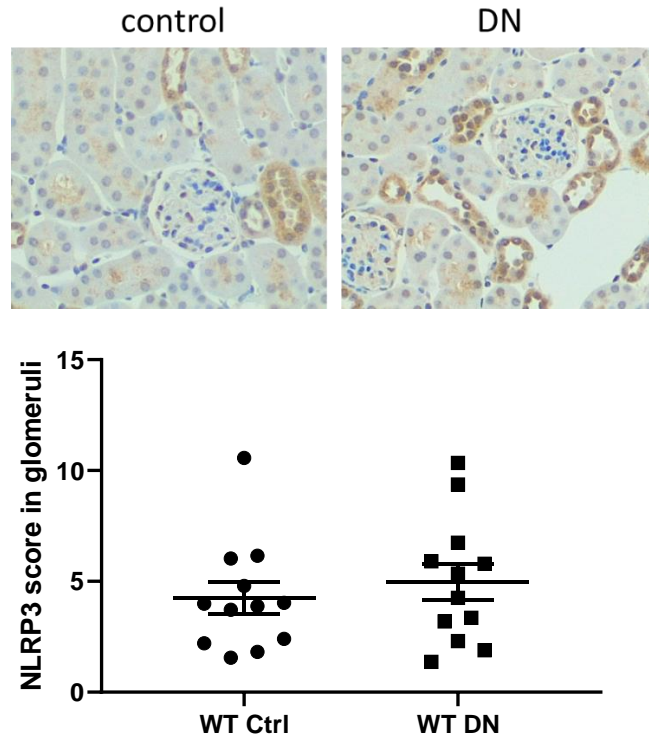

**NLRP3 score in glomeruli.** Immunohistochemical analysed in kidneys from mice (wild-type) +/- diabetes mellitus using antibody for NLRP3. Glomeruli were identified and circled by Image J software. 10-14 glomeruli have been selected for each kidney section. The positive signals in the selected glomeruli were quantified using Image J software. Immunohistochemical staining was scored by multiplying the percentage of positive signals by the intensity. Score of intensity was from 1 to 5. Magnification: 40×. Statistical analysis was performed using two-tailed *t*-tests. Each dot or triangle represents an individual sample, and horizontal bars denote the mean  $\pm$  S.E.M.

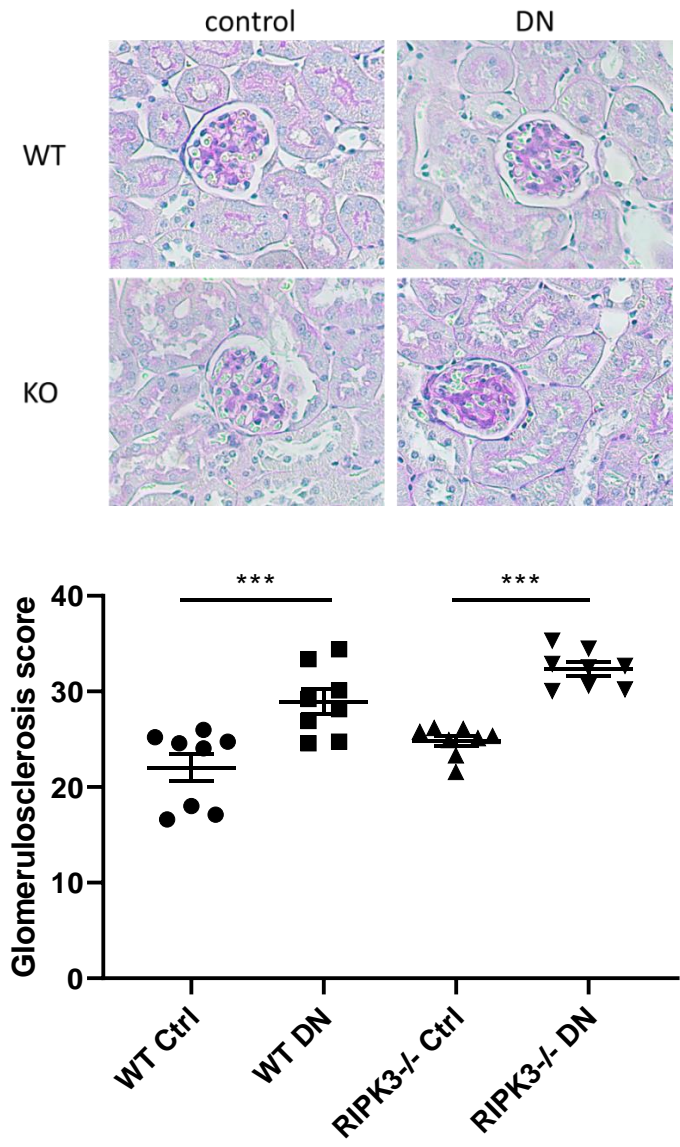

**Glomerulosclerosis score.** Periodic acid–Schiff (PAS)-stained kidney sections from mice (wild-type WT or RIPK3<sup>-/-</sup>) +/- diabetes mellitus were assessed. Glomeruli were identified and circled by Image J software. 10-14 glomeruli were selected for each kidney section. The positive signals in the selected glomeruli were quantified using Image J software and expressed as the score value. Magnification: 40×. Statistical analysis was performed using one-way ANOVA followed by Tukey's multiple comparisons test. Each dot or triangle represents an individual sample, and horizontal bars denote the mean ± S.E.M. \*\*\*, P < 0.001.
